# Supplementary material
Source: Elsevier journal article supplement (https://www.sciencedirect.com/science/article/pii/S0120334714001403)
Supplement: mmc1 [file S0120334714001403:mmc1.pdf]

---

## Anexo 1. Equipo de paro para reanimación cardiocerebro pulmonar

---

- Equipo de manejo de vía aérea
  - Cánulas nasofaríngeas (dos)
  - Sonda de Nelaton (dos)
  - Sonda nasogástrica (dos)
  - Fuente de oxígeno (una)
  - Equipo de succión (una)
  - Ambú (equipo de balón-bolsa-máscara) (uno)
  - Cánulas orofaríngeas (tres) (#3; #4; #5)
  - Tubos traqueales (tres c/u) (# 6,0; 7,0; 7,5)
  - Catéter venoso (uno) # 14
  - Guías para intubación (dos) adulto y pediátrica
  - Laringoscopio con hojas curvas o rectas (una de c/u) (# 1, #2 y #3)
  - Quick Trach® (uno)
  - Dispositivos extragloticos (máscara laríngea Supreme®) (dos: núms. 3 y 4)
  - Lidocaína en jalea y espray (una de c/u)
  - Jeringa de 10 cc para neumotaponador (una)
  - Guantes (3 pares medianos)
  - Rollo de esparadrapo (uno)
  - Rollo de micropore (uno)
- Líquidos parenterales para infusión
  - Catéteres venosos (uno c/u) #14, #16, #20)
  - Jeringas de 2 cc, 5 cc, 10 cc (tres de cada una)
  - Equipo de venoclisis (dos)
  - Catéter venoso central (uno)
  - Solución salina normal × 500 cc (una)
  - Lactato de Ringer × 1.000 cc (una)
  - Dextrosa 5% SS × 500 cc (una)
  - Soluciones coloides (gelatina o dextran) × 500 cc (una)
- Monitores
  - Desfibrilador con visoscopio (uno)

Fonendoscopio (dos)  
Tensiómetro (uno)  
Oxímetro de recuperación (uno)  
EKG (se usa el visoscopio del desfibrilador)  
Jalea conductora (uno)  
Electrodos para EKG (seis)  
Tabla para reanimación (una)  
Sonda vesical (una)

- Medicamentos (ampollas)
  - Adenosina × 6 mg ampolla (seis)
  - Aminofilina × 240 mg frasco (tres)
  - Amiodarona × 150 mg ampolla (tres)
  - Atropina × 1 mg ampolla (diez)
  - Bicarbonato de sodio 8,4% ampolla (cinco)
  - Cloruro o gluconato de calcio × 1 g (cuatro)
  - Dexametasona × 4 mg ampolla (dos)
  - Diazepam o midazolam × 5 mg ampolla (dos)
  - Digoxina × 1 mg ampolla (dos)
  - Dopamina × 200 mg frasco (dos)
  - Electrólitos (Natrol-Katrol-Magnesio) ampolla (dos c/u)
  - Epinefrina × 1 mg ampolla (diez)
  - Esmolol o propanol o metoprolol ampolla (una)
  - Fenitoína × 250 mg ampolla (tres)
  - Furosemida × 20 mg ampolla (dos)
  - Katrol ampolla (cinco)
  - Hidrocortisona × 100 mg frasco (cuatro)
  - Isordil tabletas × 5 mg (una caja)
  - Lidocaina 2% frasco (uno)
  - Manitol 20% bolsa (una)
  - Naloxona × 0,4 mg ampolla (dos)
  - Nitroglicerina frasco (una)
  - Rocuronio × 50 mg frasco (uno)
  - Succinilcolina al 10% frasco (uno)
  - Verapamilo × 5 mg ampolla (cuatro)

---

Anexo 2. Formato de código azul (registro de paro)

Hoja de control de código azul adultos

Nombre del paciente \_\_\_\_\_  
HC \_\_\_\_\_ Sexo \_\_\_\_\_  
Cama \_\_\_\_\_ Servicio \_\_\_\_\_  
Edad \_\_\_\_\_  
Fecha \_\_\_\_\_

1. Sitio de ocurrencia del evento

|                       |                          |                  |                          |
|-----------------------|--------------------------|------------------|--------------------------|
| Urgencias             | <input type="checkbox"/> | Consulta externa | <input type="checkbox"/> |
| Piso adultos          | <input type="checkbox"/> | Salas de cirugía | <input type="checkbox"/> |
| Piso niños            | <input type="checkbox"/> | UCI              | <input type="checkbox"/> |
| Laboratorios ¿Cuóles? | <input type="checkbox"/> | Sala de espera   | <input type="checkbox"/> |
|                       |                          | Otro             | <input type="checkbox"/> |

2. Causa probable desencadenante del paro

|              |                          |                |                          |
|--------------|--------------------------|----------------|--------------------------|
| Cardiaca     | <input type="checkbox"/> | Trauma         | <input type="checkbox"/> |
| No cardiaca  | <input type="checkbox"/> | ECV            | <input type="checkbox"/> |
| Atoramiento  | <input type="checkbox"/> | Otra           | <input type="checkbox"/> |
| Respiratoria | <input type="checkbox"/> | Por establecer | <input type="checkbox"/> |

3. Diagnóstico electrocardiográfico en el momento de la monitorización

|              |                          |
|--------------|--------------------------|
| Asistolia    | <input type="checkbox"/> |
| FV           | <input type="checkbox"/> |
| TV sin pulso | <input type="checkbox"/> |
| AE sin pulso | <input type="checkbox"/> |

4. Primera persona que detecta el evento

|           |                          |                             |
|-----------|--------------------------|-----------------------------|
| Médico    | <input type="checkbox"/> | Quién? <input type="text"/> |
| Enfermera | <input type="checkbox"/> |                             |
| Auxiliar  | <input type="checkbox"/> |                             |
| Otro      | <input type="checkbox"/> |                             |

5. Información del evento a la central (#xxx)

Inmediata ☐

Aproximadamente \_\_\_\_ min. despues del evento, A los \_\_\_\_, llegada del personal de codigo azul

6. Tiempo de inicio de las maniobras de reanimación

|                              |                          |
|------------------------------|--------------------------|
| Inmediato                    | <input type="checkbox"/> |
| De 1 a 4 minutos (¿Cuántos?) | <input type="checkbox"/> |
| >5 min                       | <input type="checkbox"/> |
| Orden NR                     | <input type="checkbox"/> |

7. Tiempo aproximado de la primera descarga

|                                        |                                          |
|----------------------------------------|------------------------------------------|
| Inmediato                              | <input type="checkbox"/>                 |
| de 1 a 4 minutos,                      | <input type="checkbox"/>                 |
| >5 min                                 | <input type="checkbox"/>                 |
| Monofásico <input type="checkbox"/>    | Bifásico <input type="checkbox"/>        |
| Voltaje utilizado <input type="text"/> | Número de descargas <input type="text"/> |

8. Control de la vía aérea

|                          |                                                         |
|--------------------------|---------------------------------------------------------|
| Previamente intubado     | <input type="checkbox"/>                                |
| Intubado durante RCP     | <input type="checkbox"/>                                |
| Manejo con bolsa-máscara | <input type="checkbox"/>                                |
| Dispositivo supraglótico | Sí <input type="checkbox"/> No <input type="checkbox"/> |
|                          | ¿Cuál? <input type="text"/>                             |
| Capnometría              | Sí <input type="checkbox"/> No <input type="checkbox"/> |
| Valores capnometría      | <input type="text"/>                                    |

9. Vía de administración medicamentos

|              |                          |
|--------------|--------------------------|
| Intravenosa  | <input type="checkbox"/> |
| Intraósea    | <input type="checkbox"/> |
| Endotraqueal | <input type="checkbox"/> |

10. Duración de las maniobras

|              |                          |
|--------------|--------------------------|
| 0 a 5 min.   | <input type="checkbox"/> |
| 5 a 10 min.  | <input type="checkbox"/> |
| 10 a 15 min. | <input type="checkbox"/> |
| 15 a 20 min. | <input type="checkbox"/> |
| > de 20 min. | <input type="checkbox"/> |

# Hoja de control de código azul adultos

## 11. Personal que participa en la RCP

|                        |                      |
|------------------------|----------------------|
| Medico del código      | <input type="text"/> |
| Enfermera jefe         | <input type="text"/> |
| Terapeuta respiratoria | <input type="text"/> |
| Otros médicos          | <input type="text"/> |
| Auxiliar de enfermería | <input type="text"/> |
| Tecnologo              | <input type="text"/> |

## 12. Medicamentos utilizados durante el paro

|             |                      |        |
|-------------|----------------------|--------|
| Adrenalina  | <input type="text"/> | Dosis: |
| Vasopresina | <input type="text"/> | Dosis: |
| Atropina    | <input type="text"/> | Dosis: |
| Amiodarona  | <input type="text"/> | Dosis: |
| Inotrópicos | <input type="text"/> | ¿Cuál? |
| Otros       | <input type="text"/> |        |

## 13. Tiempo del retorno a la circulación espontánea

|              |                      |
|--------------|----------------------|
| 0 a 5 min.   | <input type="text"/> |
| 5 a 10 min   | <input type="text"/> |
| 10 a 15 min. | <input type="text"/> |
| 15 a 20 min. | <input type="text"/> |
| > de 20 min. | <input type="text"/> |

## 14. Manejo pos-retorno a la circulación espontánea (ROSC)

|                |                               |                                  |
|----------------|-------------------------------|----------------------------------|
| Inotrópicos    | <input type="text"/>          | Which?                           |
| Vasopresores   | <input type="text"/>          | Which?                           |
| Hipotermia     | <input type="text"/>          | Degrees                          |
| Antiarrítmicos | <input type="text"/>          | Which?                           |
| Ventilación    | Invasiva <input type="text"/> | No invasiva <input type="text"/> |

## 15. Maniobras de RCP exitosas?

Sí  No

## 16. Destino Pos-Reanimación

|             |                      |        |
|-------------|----------------------|--------|
| UCI         | <input type="text"/> | ¿Cuál? |
| Hemodinamia | <input type="text"/> |        |
| Urgencias   | <input type="text"/> | ¿Cuál? |
| Otro        | <input type="text"/> | ¿Cuál? |

## 17. ¿Se informa la familia?

Sí  No

## 18. ¿Se realiza autopsia?

Sí  No

Caso médico legal Sí  No

¿Por qué no?

---



---

Nombre completo

---

Firma

---

## Observaciones finales del proceso

Al final del proceso completo de reanimación, se hará un análisis de lo sucedido, así como de los aciertos y errores cometidos durante el mismo. Igualmente, se darán órdenes respectivas en caso de que el paciente haya recuperado su circulación para proceder con los numerales 12 y 13, respectivamente. Siempre trate de determina si eventualmente pudiera haber una orden de "no reanimación" (NR).
